# Supplementary material
Source: Springer Nature journal article supplement (https://www.springermedizin.de/resource/supplementary/12947_2007_190_MOESM1_ESM.pdf/9556546)

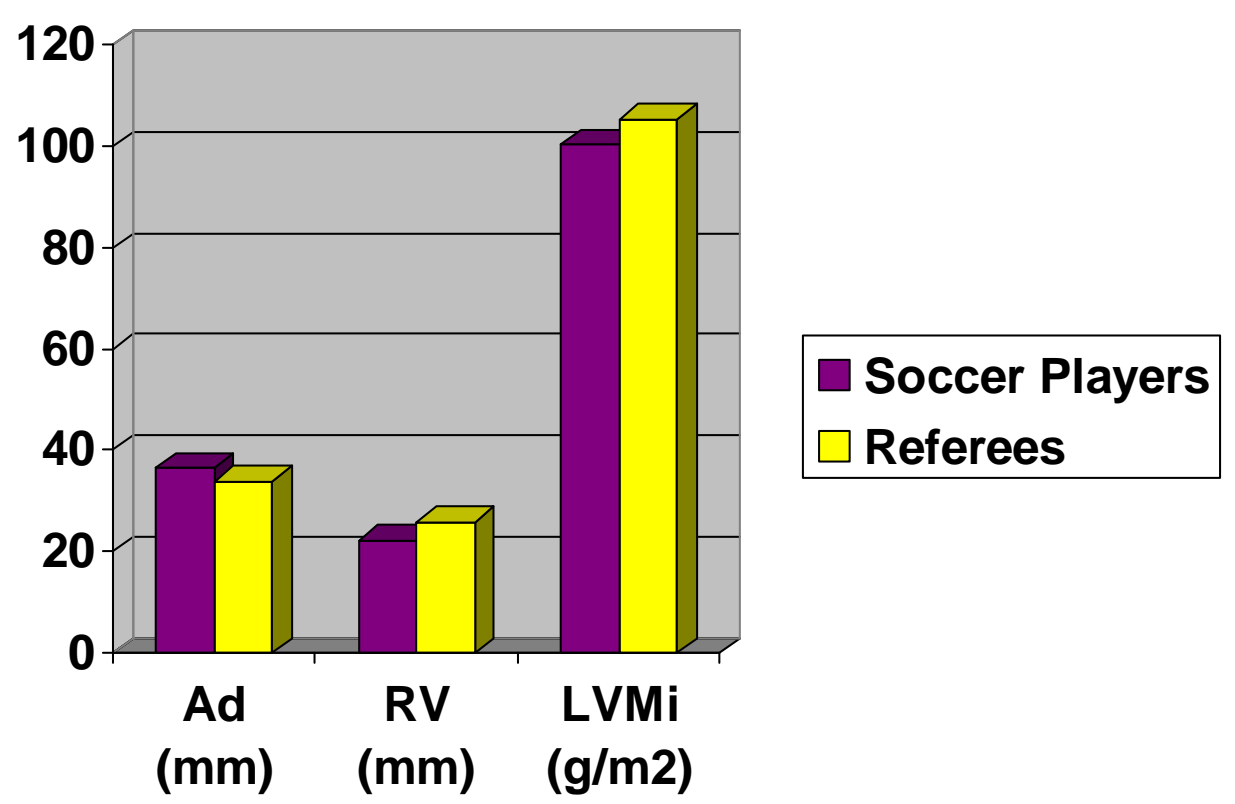

Supplement: MOESM1 [file 9556546]
